# Supplementary material for: Cyclic AMP signaling in Dictyostelium promotes the translocation of the copine family of calcium-binding proteins to the plasma membrane
Source: PubMed Central journal article supplement (PMC6048903; doi:10.1186/s12860-018-0160-5), 2018-07-16

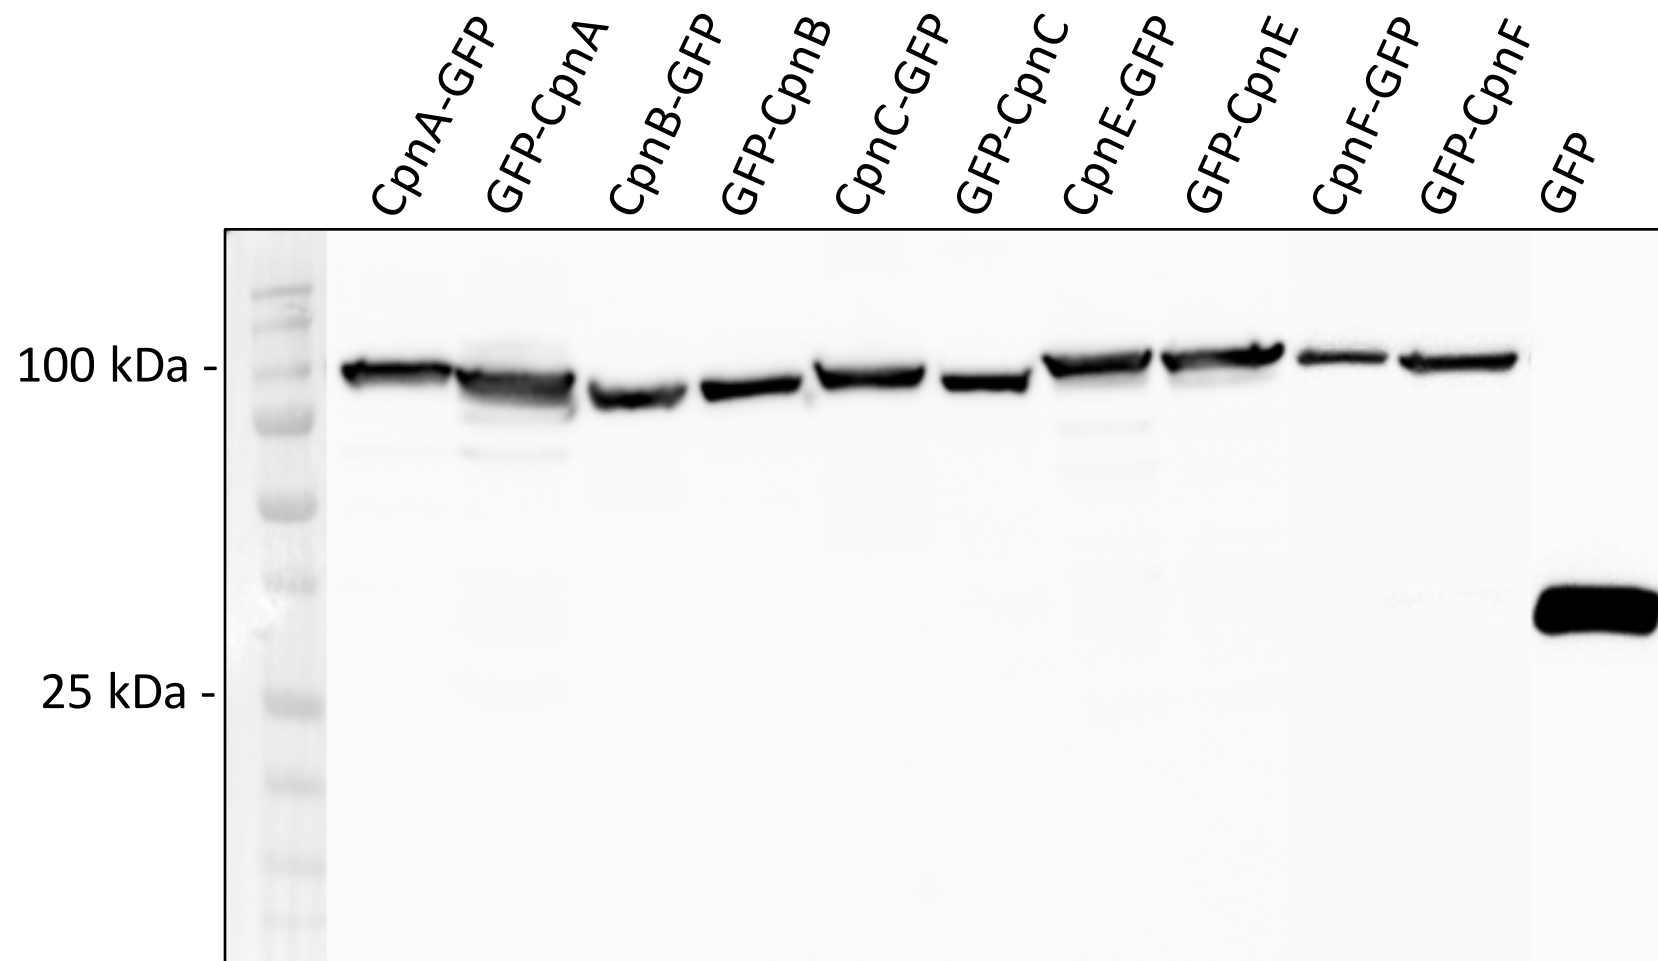

Supplement: 12860_2018_160_MOESM1_ESM.pdf [file 12860_2018_160_MOESM1_ESM.pdf]
